# Supplementary material
Source: publisher site journal article supplement (https://www.spandidos-publications.com/164/downloadSupplementary)

Figure S1. Effects of TGF- $\beta$  on epithelial mesenchymal transition in CBR1-overexpressing cells. CBR1 cells were treated with recombinant TGF- $\beta$ 1 (0, 100 and 500 pg/ml) for 24 h. The expression levels of Smad2, P-Smad2, Smad3, P-Smad3, Snail and E-cadherin were evaluated by western blot analysis.  $\beta$ -tubulin was used as an internal control. mRNA levels of *CDH1* and *SNAIL* were measured by reverse transcription-PCR. GAPDH was used as an internal control. Data are expressed as the ratio of the mRNA level of each molecule to the *GAPDH* mRNA level, and presented as the mean  $\pm$  SEM of three independent experiments. \* $P$ <0.05 vs. 0 pg/ml. TGF- $\beta$ , transforming growth factor- $\beta$ ; p, phosphorylated; *CDH1*, cadherin 1; *SNAIL*, snail family transcriptional repressor 1.

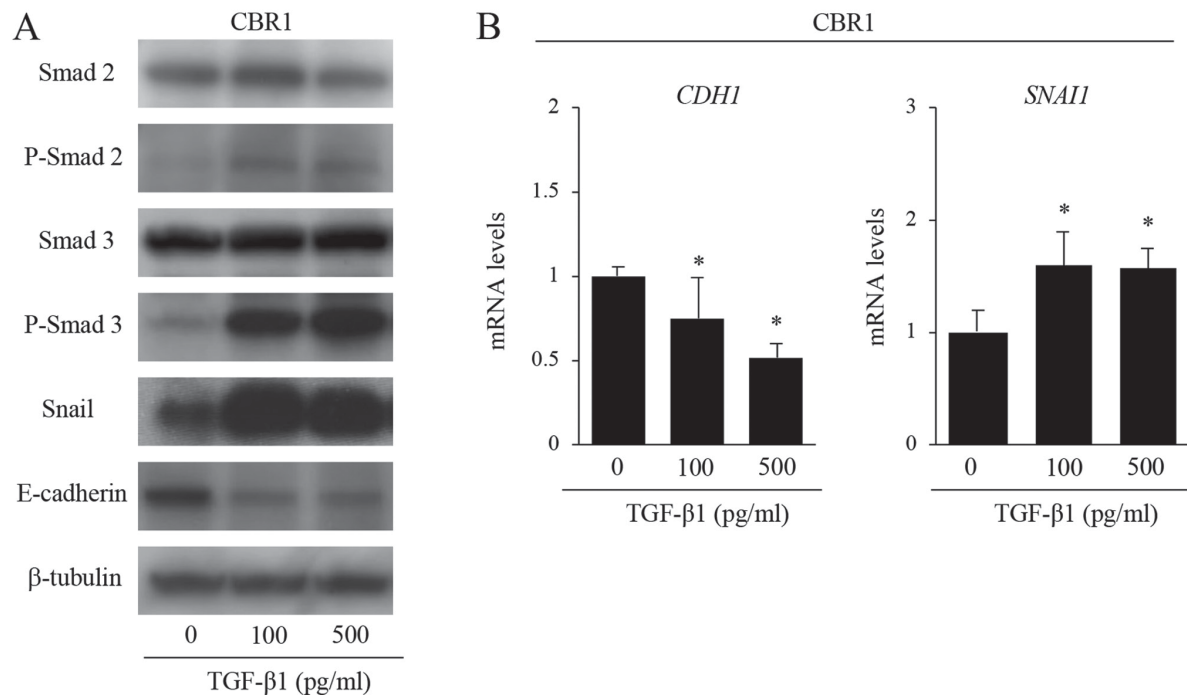

Supplement: Supplementary file 1 [file downloadSupplementary]
